# Supplementary material
Source: Research Square preprint supplement (doi:10.21203/rs.3.rs-7068850/v1)
Supplement: Supplementary file 1 [file 8607d752101e3ff361e9e102.docx]

**PATIENT SATISFACTION SURVEY**

You are receiving this survey as you are receiving clozapine treatment for psychosis. Clozapine requires regular blood tests to prevent a rare but serious condition where the body’s white blood cell count drops dangerously low, which makes your immune system weaker. Pharmacies are not permitted to dispense clozapine without a blood test—no blood test means no medication. In the past few years, there is a new, safe, and accurate way of doing the blood test needed for clozapine. Instead of the typical arm-based blood draw at a lab, you can use a fingerstick device in the clinic. **We want to understand your experience of doing blood tests for your clozapine treatment. Please answer the following questions.**

1. Have you ever used the finger-prick test to monitor your blood count for clozapine treatment?
   1. Yes
   2. No *(If ‘No’ was selected, skip to Q18)*
2. In the past year, do you use the finger-prick test more than 50% of the time when you need a blood test for clozapine treatment?
   1. Yes
   2. No

***If Yes to Q1 and Q2 [GROUP 1: FREQUENT USERS]:***

1. When did you first start using the finger-prick test?
   1. In the past month
   2. In the past 2-6 months
   3. In the past year
   4. More than one year ago
2. When was the last time you used the finger-prick test?
   1. In the past month
   2. In the past 2-6 months
   3. In the past year
   4. More than one year ago
3. Before trying the finger-prick test, did you discuss this change in blood test method with anyone beside your care team? (Select all that applies)
   1. No
   2. Yes, with a family member/relative
   3. Yes, with a friend
   4. Yes, with another patient who have tried the finger-prick test
   5. Other:____________
4. Overall, how would you rate your experience of the finger-prick test?
5. (4) Very good;
6. (3) Good;
7. (2) Average;
8. (1) Poor

6a. *If ‘Poor’ was selected in Q5:* What did you **not like** about your experience with the finger-prick test? *(open-ended, optional)*

7. How useful is it for you to know if your white blood cell counts are normal when you visit the clinic?

a. (3) Useful;

b. (2) Indifferent, doesn’t matter to me;

c. (1) Not useful

1. Based on your experience, do you prefer the finger-prick test or taking a blood sample from your arm?
2. Finger-prick test
3. Blood sample from my arm

*8a. If chosen ‘finger-prick test’ in Q8:* Compared to taking a blood sample from my arm, I prefer the finger-prick test because: (Check all that applies)

1. It is more convenient for me
2. It is less painful
3. I like knowing the results immediately
4. I have a better understanding why my doctors monitor my white blood cell count
5. I feel more involved in my care
6. I can make better decisions with my psychiatrist about my medications
7. I can pick up my prescriptions faster
8. Other:

*8b. If chosen ‘blood sample from arm’ in Q8:* Compared to the finger-prick test, I prefer taking a blood sample from my arm because: (Check all that applies)

1. It is more convenient for me
2. The clinic is far away
3. It is less painful
4. I don’t think the finger-prick test is accurate
5. I don’t like knowing my white blood cell count
6. I don’t feel I need to change anything about my care
7. I can pick up my prescriptions faster
8. Other:
9. Will you continue to use the finger-prick test in the future for blood count monitoring needed for clozapine treatment?
10. Yes
11. No:

*9a. If ‘No’ in Q9:* Why not? *(open-ended, optional)*

1. What might make it easier for you to continue to use the finger-prick test in the future for blood count monitoring for clozapine treatment?
   1. If I can do it at my nearest pharmacy
   2. If I can do it at my PCP
   3. If I can do it at a blood draw lab nearest to me
   4. If I can do it at home myself
   5. Nothing, I like doing it in the clinic
   6. Other (please elaborate):

***If Yes to Q1 and No to Q2 [GROUP 2: INFREQUENT USERS]*:**

1. When did you first try the finger-prick test?
   1. In the past month
   2. In the past 2-6 months
   3. In the past year
   4. More than one year ago
2. When was the last time you used the finger-prick test?
3. In the past month
4. In the past 2-6 months
5. In the past year
6. More than one year ago
7. Before trying the finger-prick test, did you discuss this change in blood test method with anyone beside your care team? (Select all that applies)
   1. No
   2. Yes, with a family member/relative
   3. Yes, with a friend
   4. Yes, with another patient who have tried the finger-prick test
   5. Other:____________
8. Overall, how would you rate your experience of the finger-prick test?
   1. (4) Very good;
   2. (3) Good;
   3. (2) Average;
   4. (1) Poor

14a. *If ‘Poor’ was selected in Q14:* What did you **not like** about your experience with the finger-prick test? *(open-ended, optional)*

1. How useful is it for you to know if your white blood cell counts are normal when you visit the clinic?

a. (3) Useful;

b. (2) Indifferent, doesn’t matter to me;

c. (1) Not useful

1. Why did you decide not to continue with using the finger-prick test for blood count monitoring for clozapine treatment? (Check all that applies)
2. I preferred to do monitoring with using a blood sample from my arm
3. It was less convenient for me to come into the clinic
4. It was more painful
5. I did not like knowing the results of my blood count
6. It did not provide me with better care
7. I didn’t want to change anything about my care
8. I could pick up my prescriptions faster without the finger-prick test
9. A family member or friend advised against it
10. Other (please elaborate):
11. What might make it easier for you to try using the finger-prick test in the future for blood count monitoring for clozapine treatment? (Check all that applies)
12. If I can do it at my nearest pharmacy
13. If I can do it at my PCP
14. If I can do it at a blood draw lab nearest to me
15. If I can do it at home myself
16. If I have more understanding about the finger-prick test
17. If I have more understanding about my blood count results.
18. If a friend or family member can bring me to the clinic when I need to do the finger-prick test
19. Nothing, I’m unlikely to try using the finger-prick test in the future.
20. Other (please elaborate):

***If No to Q1 [GROUP 3: HAVE NOT TRIED]*:**

1. Have your prescriber or another provider recommended doing the finger-prick test?
2. Yes *(complete Q19, 20, 21)*
3. No *(If ‘No’ was selected, skip to educational summary, then Q20, 21)*
4. Unsure/Don’t know *(If ‘Maybe’ was selected, skip to educational summary, then Q20, 21)*
5. Why did you decide not to try the finger-prick test? (Check all that applies)
6. I didn’t understand the purpose of it
7. I didn’t think it will provide me with better care
8. It sounded/looked like it would be more painful
9. It was less convenient for me to come into the clinic
10. I didn’t want to change anything about my care
11. Other (please elaborate):

***[EDUCATIONAL SUMMARY*]:** ***Let us tell you more about the finger-prick test. Clozapine treatment requires regular blood tests to prevent a rare but serious condition where the body’s white blood cell count drops dangerously low. A FDA-approved device safely and accurately measures your blood count by using a drop of blood from your finger. Many people who have used the finger-prick test find it to be less painful than the traditional arm-based blood draw. It can also be done more conveniently in the clinic, or even at home, avoiding trips to separate blood draw labs. Results of your blood tests are also available within 3 minutes, and automatically records your blood test results in the REMS program, which pharmacists can check and dispense clozapine without delay. This safe and simple way to do your blood draw may be less painful and more convenient, and may ensure you continue to get clozapine treatment without interruption due to a missed or late blood draw.***

1. Will you be interested in trying the finger-prick test instead of taking a blood sample from your arm for your next blood count monitoring needed for clozapine?
2. Yes *(go to Q20a)*
3. Maybe, not sure yet *(go to Q20b)*
4. No *(go to Q20b)*

*20a. If ‘Yes’ or ‘Maybe’ in Q20:* I may be interested in trying the finger-prick test because: (Check all that applies)

1. It is more convenient for me to come into the clinic
2. It sounds less painful than taking a blood sample from my arm
3. I like the idea of knowing the results immediately
4. I like to have a better understanding of my blood count
5. I like the idea of being involved in my care
6. I want to make better decisions with my psychiatrist about my medications
7. I want to be able to pick up my prescriptions faster
8. Other:

*20b. If ‘Maybe’ or ‘No’ in Q20:* I want to continue taking a blood sample from my arm because: (Check all that applies)

1. It is more convenient for me
2. The clinic is far away
3. It sounds less painful than a finger-prick test
4. I don’t think the finger-prick test is accurate
5. I don’t like knowing my blood count
6. I don’t feel I need to change anything about my care
7. I can pick up my prescriptions faster
8. Other:
9. What might make it easier for you to try using the finger-prick test in the future for blood count monitoring for clozapine treatment? (Check all that applies)
10. If I can do it at my nearest pharmacy
11. If I can do it at my PCP
12. If I can do it at a blood draw lab nearest to me
13. If I can do it at home myself
14. If I have more understanding about the finger-prick test
15. If I have more understanding about my blood count results.
16. If I can talk to someone who has tried the finger-prick test before
17. If I could talk it over with a family member or friend
18. Nothing, I’m unlikely to try using the finger-prick test in the future.
19. Other (please elaborate):

**PROVIDER GROUP INTERVIEW GUIDE**

*In [MM/YY], FTC/PCRP introduced the Athelas One, a FDA-approved fingerstick blood diagnostics device that can potentially make ANC blood monitoring easier for patients on clozapine and their prescribers. We’ve been asking patients and prescribers about their preferences, experiences and feedback about the fingerstick device. We wanted to get more in-depth insights and higher-level considerations on using point-of-care testing for clozapine in routine care.*

*We’d take notes as you speak and also audio-record the focus group for transcription and coding purposes. Does anyone have any questions or concerns? Is anyone not comfortable with this? [ONCE EVERYONE PROVIDES THEIR CONSENT, START RECORDING]*

1. What were your clinic’s primary motivations for implementing clozapine POC?
   1. Which of these goals were/weren’t met?
   2. How did you expect clozapine POC to go? (e.g., expectations of how it would be received by patients, how burdensome it would be to staff). In what ways did it go the way you expected? How about not how you expected?
2. *(Thinking of experience and lessons learnt that you could impart to similar outpatient/community settings interested in implementing clozapine POC)* What did it take FTC/PCRP to implement clozapine POC?
   1. What resources/supports did the clinic/ providers need?
   2. What adaptations/changes to the way you provide services was needed to make clozapine POC fit with your workflow? With the patient experience? What resources or training did providers need?
   3. What are some examples of how providers introduced POC to patients? Were there particular strategies that seemed helpful in facilitating uptake of POC?
3. What were some challenges/barriers/areas of resistance you faced when implementing clozapine POC in your clinic? How did you overcome them?
   1. Probe for challenges with billing/reimbursement; cost/funding; any other challenges?
